# Supplementary material for: Waste activated sludge (WAS) dewatering properties of an original hydrophobically modified polyacrylamide containing a cationic microblock structure
Source: Royal Society of Chemistry journal article supplement (doi:10.1039/c7ra02939j), 2017-01-01
Supplement: c7ra02939j1.pdf [file c7ra02939j1.pdf]

## Cover Page for Supporting Information

**Manuscript title:** Waste Activated Sludge (WAS) Dewatering Properties of an Original Hydrophobically Modified Polyacrylamide Containing Cationic Microblock Structure

Yuhao Zhou<sup>a,b</sup>, Huaili Zheng<sup>a,b\*</sup>, Baoyu Gao<sup>c</sup>, Yingpeng Gu<sup>a,b</sup>, Xiang Li<sup>a,b</sup>, Bingzhi Liu<sup>a,b</sup>, Andrea Mavarro Jiménez<sup>a,b</sup>

a. Key laboratory of the Three Gorges Reservoir Region's Eco-Environment, State Ministry of Education, Chongqing University, Chongqing 400045, China

b. National Centre for International Research of Low-carbon and Green Buildings, Chongqing University, Chongqing 400045, China

c. Shandong Key Laboratory of Water Pollution Control and Resource Reuse, School of Environmental Science and Engineering, Shandong University, Jinan 250100, China

\*Corresponding author. Tel.: +86 23 65120827; fax: +86 23 65120827.

E-mail address: zhl@cqu.edu.cn (Huaili Zheng)

Total number of pages (including the cover page): 3 pages

This file contains 3 Figures.

### Contents:

**Figure. S1.** The proposed reaction route of TPADL.

**Figure. S2.** Floc size ( $d_{50}$ ) distribution of samples conditioned by (a) TPADL, (b) PADL, (c) TPAD and (d) PAD after breakage.

**Figure. S3.** Floc size ( $d_{50}$ ) distribution of samples conditioned by (a) TPADL, (b) PADL, (c) TPAD and (d) PAD after recovery.

## Figures

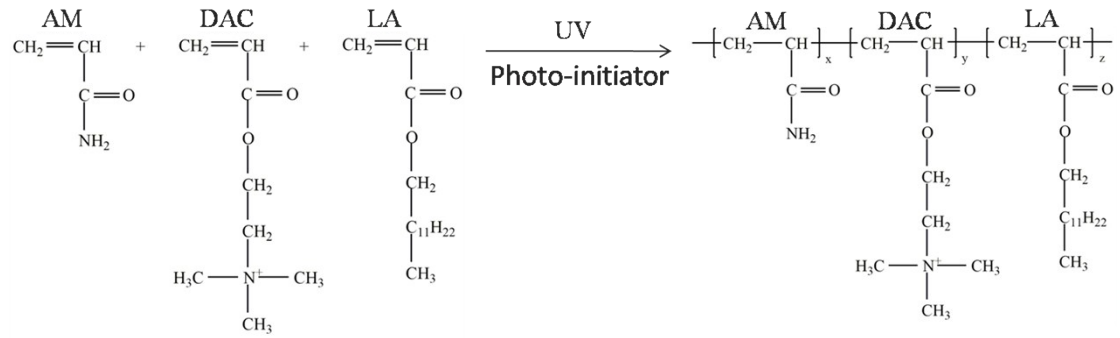

**Figure. S1.** The proposed reaction route for TPADL

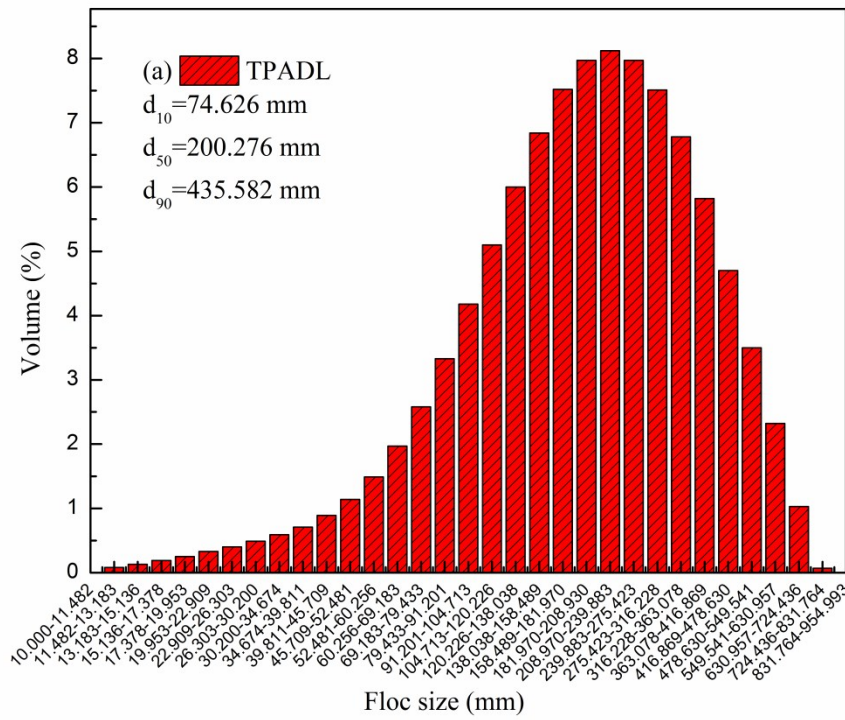

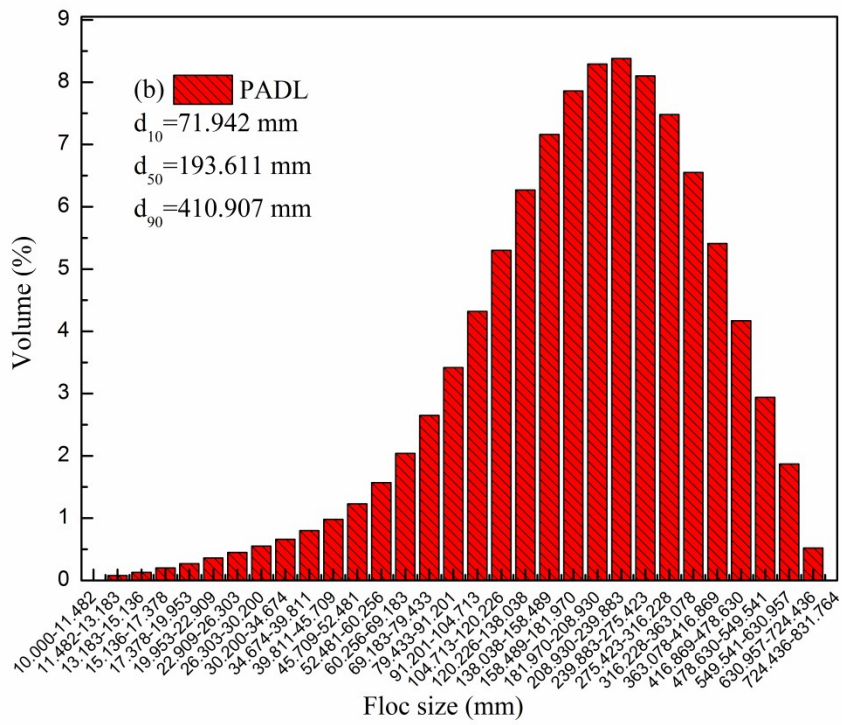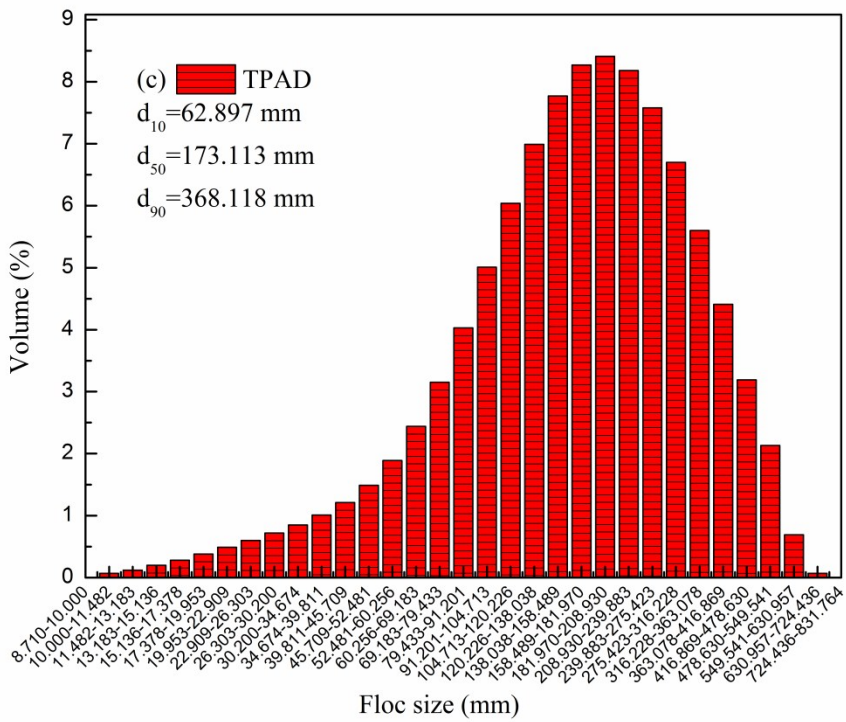

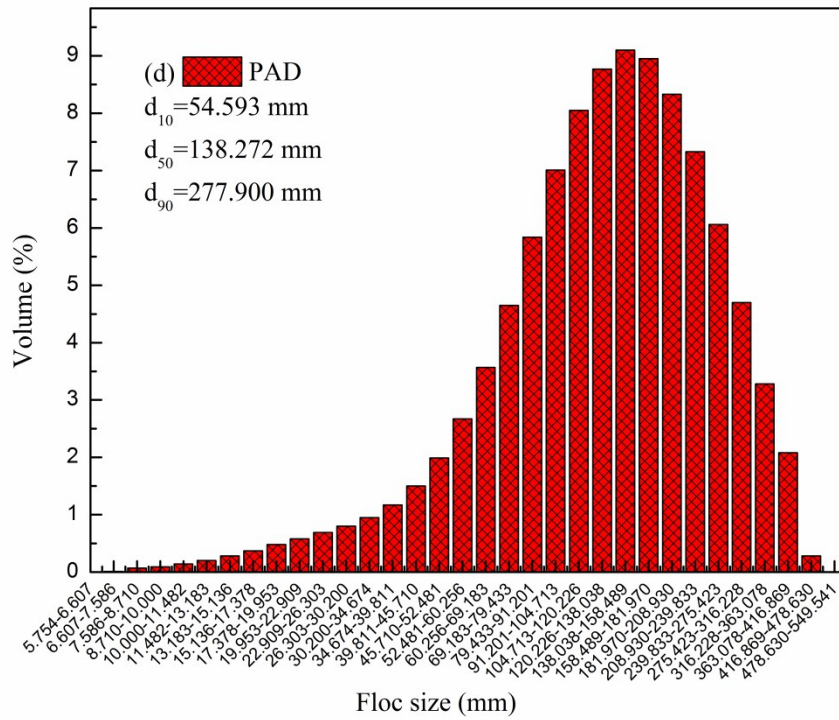

**Figure. S2.** Floc size ( $d_{50}$ ) distribution of samples conditioned by (a) TPADL, (b) PADL, (c) TPAD and (d)PAD after breakage.

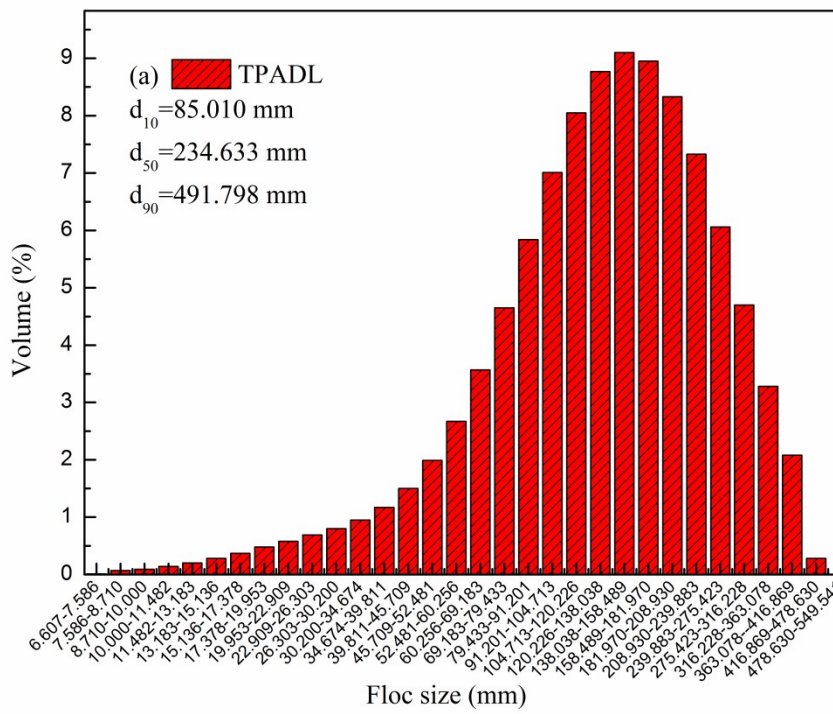

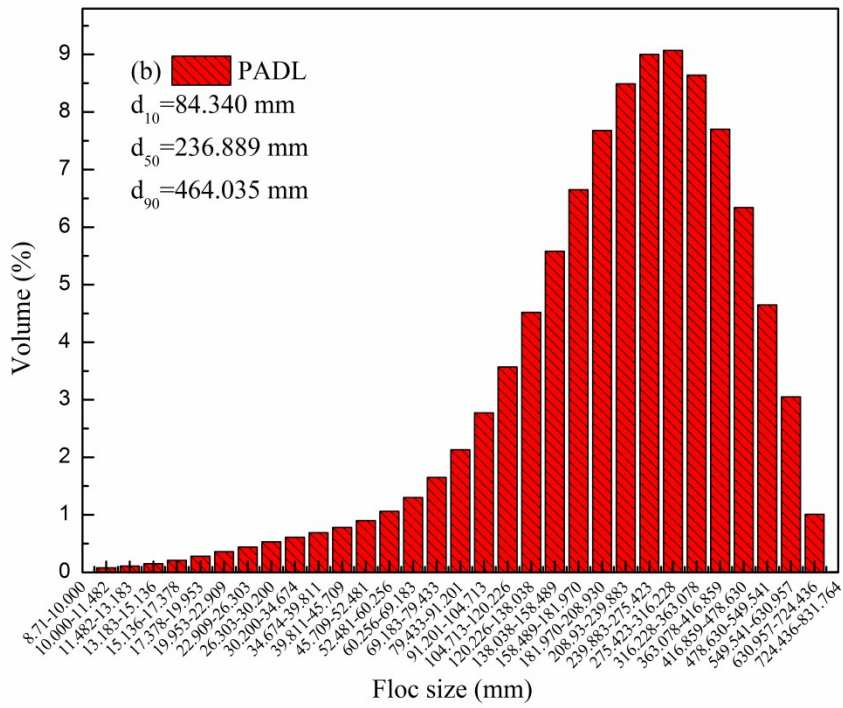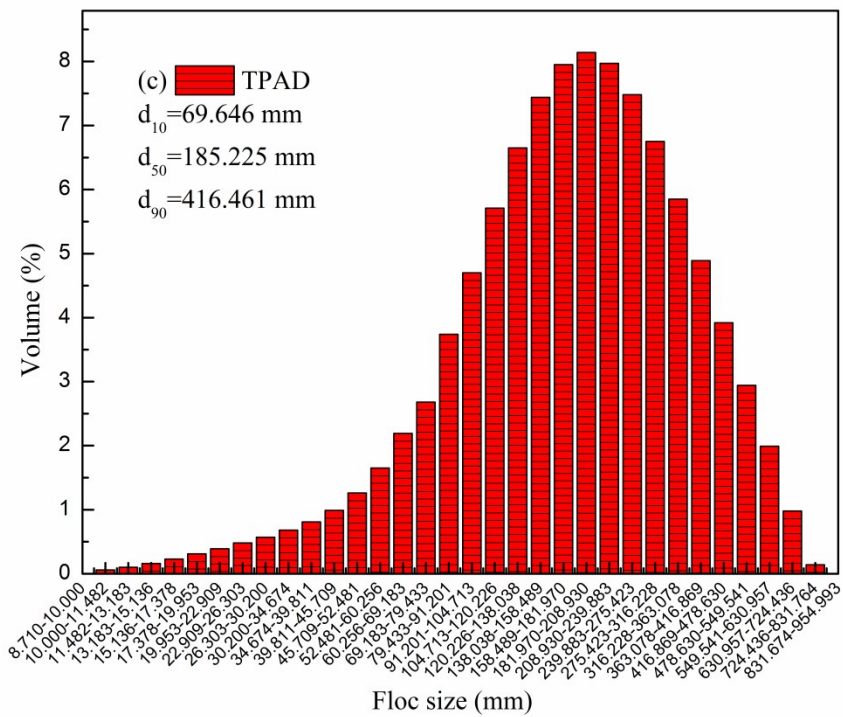



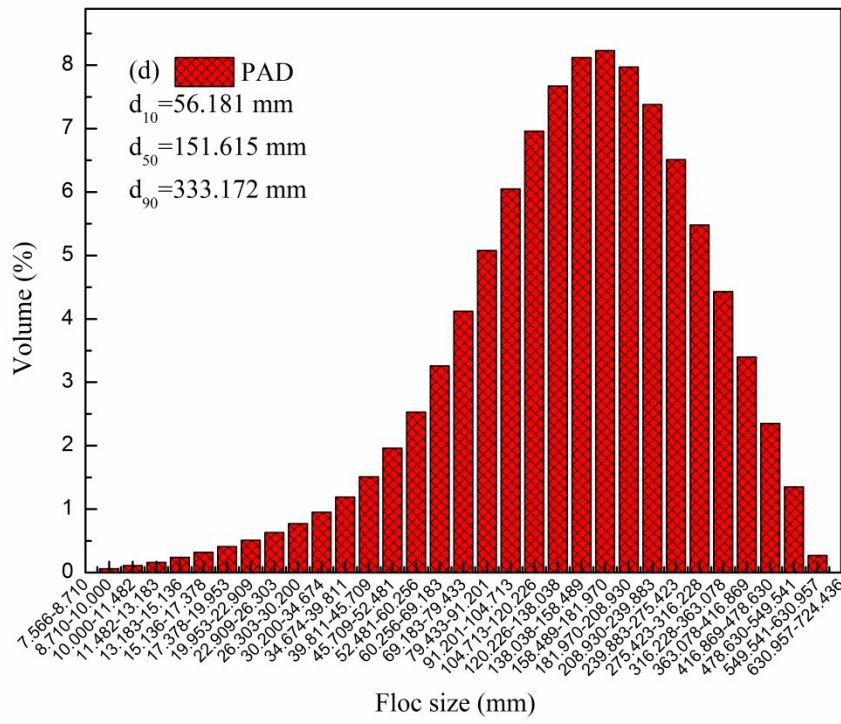

**Figure. S3.** Floc size ( $d_{50}$ ) distribution of samples conditioned by (a) TPADL, (b) PADL, (c) TPAD and (d) PAD after recovery.
